# Supplementary material
Source: PubMed Central journal article supplement (PMC2662183)

## SUPPLEMENTAL MATERIALS

TABLE. S1. List of gene-specific primer sets for SYBR Green real-time qPCR and RT-PCR.

| gene name           | gene symbol | forward primer           | reverse primer            |
|---------------------|-------------|--------------------------|---------------------------|
| GAPDH               | GAPDH       | ACCCACTCCTCCACCTTTGAC    | TCCACCACCCTGTTGCTGTAC     |
| caldesmon           | CALD1       | CGCCAGAAGATGCCAGAAGATG   | TTGGAGACTATTGCTGCTTGATGG  |
| tropomyosin 1       | TPM1        | CGGTCGGCATCTTCAGCAATG    | GAGAGTGAGAGAGGCATGAAAGTC  |
| tropomyosin 2       | TPM2        | CAGAAATTGCCAACATTGC      | AAACCATGAAGCCAGTGC        |
| fascin 1            | FSCN1       | GGAGACCGACCAGGAGAC       | CATTGGACGCCCTCAGTG        |
| filamin A           | FLNA        | CATCAAGTACGGTGGTGACG     | ACATCCACCTCTGAGCCATC      |
| p34Arc              | ARPC2       | ACAGAGTCACAGTAGTCTTCAG   | TAATGTAGCCAATGTTGTCACC    |
| p21Arc              | ARPC3       | AGATACAGATATTGTGGATGAAGC | ATACATTTCTTTCTCACCTTGGC   |
| vinculin            | VCL         | TCAGATGAGGTGACTCGGTTGG   | GGGTGCTTATGGTTGGGATTCCG   |
| zyxin               | ZYX         | AGGCAGAATGTGGCTGTCAAC    | GGTGAAGCAGGCGATGTGG       |
| talin 1             | TLN1        | CCCTGATGTGCGGCTTCG       | TGTCCTGTCAACTGCTGCTTC     |
| paxillin            | PXN         | CCCTGACGAAAGAGAAGCCTAAG  | AGATGCGTGTCTGCTGTTGG      |
| actinin 1           | ACTN1       | CCAAGATTGTCCAGACCTACCAC  | CCTCTCATTGTGCTGCTGTCCG    |
| cortactin           | CTTN        | GCCGACCGAGTAGACAAG       | GTATTTGCCGCCGAAACC        |
| $\beta$ 1-catenin   | CTNNB1      | GGTCCTCTGTGAACTTGCTC     | TTCTTGTAATCTTGTGGCTTGTCC  |
| $\alpha$ 1-integrin | ITGA1       | GGTGCTTATTGGTTCTCCGTTAG  | TTCTCCTTTACTTCTGTGACATTGG |
| $\beta$ 1-integrin  | ITGB1       | GAGGAGGATTACTTCGGACTTCAG | GCTGGTGTGCTAATGTAAGG      |
| gelsolin            | GSN         | TGTCCTACCTTTCCAGCCATATCG | TGTCGCCTCCATAGAAGTGTCC    |
| profilin 1          | PFN1        | GGGAAAACGTTCTGCAACAT     | ACACCTTCTTTGCCCATCAG      |
| cofilin 1           | CFL1        | GCCAACTTCTAACCGCAATAG    | CCTTACTGGTCTGCTTCC        |
| $\beta$ actin       | ACTB        | GAACGGTGAAGGTGACAG       | TTTAGGATGGCAAGGGACT       |
| tubulin $\alpha$ 1a | TUBA1A      | GACGACTCCTTCACCACCTTC    | GCATAGTTGTTGGCAGCATCC     |
| EGFP                | EGFP        | ACGTAAACGGCCACAAGTTC     | AAGTCGTGCTGCTTCATGTG      |
| total CaD           |             | GCAGAAAAGCAGTGGTGTCA     | GCGAATTAGCCCTCTACAAGTCTG  |
| fibroblast CaD      |             | CCTCGGGAAGAAGTTTCAGA     | GTTGGGTCGAACTCCTTCTG      |
| HeLa CaD            |             | GACAAGCCCAGACTTTTCGTC    | GTTGGGTCGAACTCCTTCTG      |

## SUPPLEMENTAL FIGURE LEGENDS

**FIGURE S1. GC-dependent transactivation driven by the retroviral expression system.** First cDNA was synthesized from the GFP-A549 cells, which were stably transfected by retroviral infection, and treated with vehicle or 1  $\mu$ M DEX for 24 hours. Real-time qPCR was then performed using the cDNAs. The expression level of GFP was normalized to the GAPDH expression in each sample (mean  $\pm$  SD, \*\*\*,  $p < 0.001$ ).

**FIGURE S2. Comparison of the expression of the two CaD mRNAs.** A549 cells were incubated with vehicle or 1  $\mu$ M DEX for the indicated times. The expression levels of CaD mRNA were measured by semi-quantitative RT-PCR using three primer sets, one each for the fibroblast- and HeLa-type CaDs, and one to ascertain the total CaD mRNA.

**FIGURE S3. Alignment of the fibroblast-type CALD1 gene promoter region from various species.** Proximal regions of the fibroblast-type *CALD1* gene of Human (*H. sapiens*), rat (*R. norvegicus*), and mouse (*M. musculus*) are shown. The conserved residues are shaded. The two GRE-like sequences (GRE-like1 and GRE-like2) are underlined.

**FIGURE S4. Effect of CaD depletion on stress fiber stability to cytochalasin D.** A549 cells transfected with CaD siRNAs or control siRNA were incubated with vehicle or 1  $\mu$ M DEX for 48 hr. The cells were treated with or without 0.2  $\mu$ M cytD for 20 min, and stained with phalloidin. Bar: 50  $\mu$ m.

**FIGURE S5 GFP-CaD expression counteracts the effects of endogenous CaD depletion.** Effect of DEX on the actin cytoskeleton of GFP-CaD-expressing A549 cells, which were depleted of endogenous CaD by the CaD siRNA2. The cells were stained with anti-GFP (*green* in merged image), anti-CaD (*red* in merged image), and phalloidin (*blue* in merged image). Bar: 50  $\mu$ m.

S1

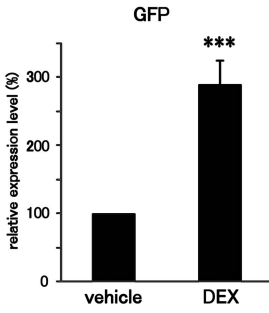

S2

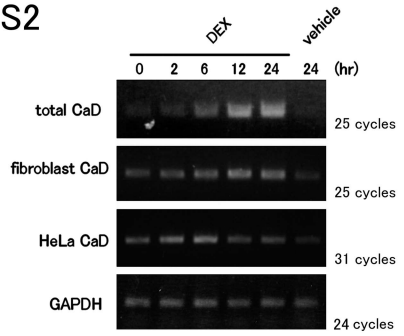

S3

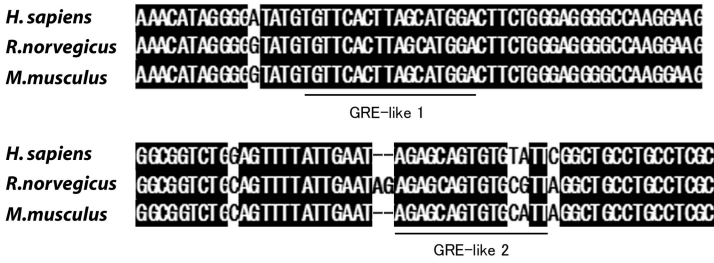

S4

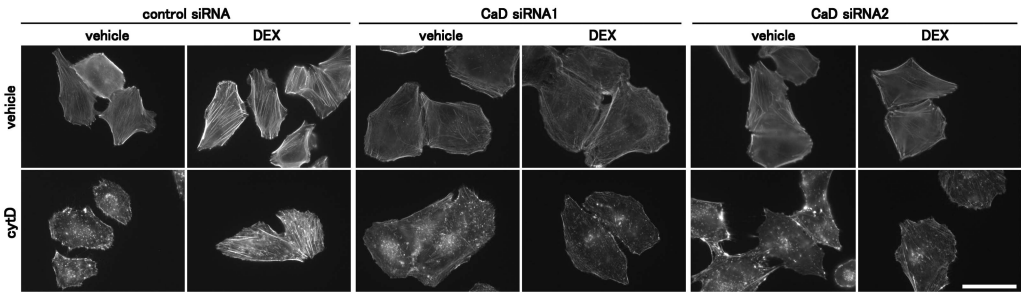

S5

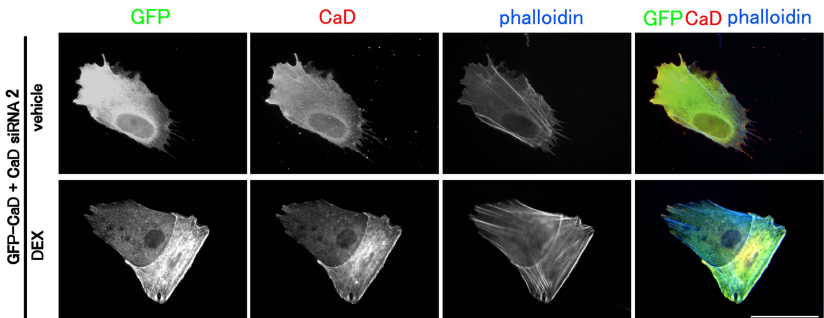

Supplement: M801606200_1.pdf [file M801606200_1.pdf]
